# Supplementary material for: Splicing and Expression Regulation of fruitless Gene in Bemisia tabaci (Hemiptera: Aleyrodidae)
Source: MDPI journal article supplement (doi:10.3390/horticulturae9090962), 2023-08-24

**Figure S1. The phylogenetic tree of known *fru* genes in insects.** Two *B. tabaci* *fru* transcripts are highlighted in red word.

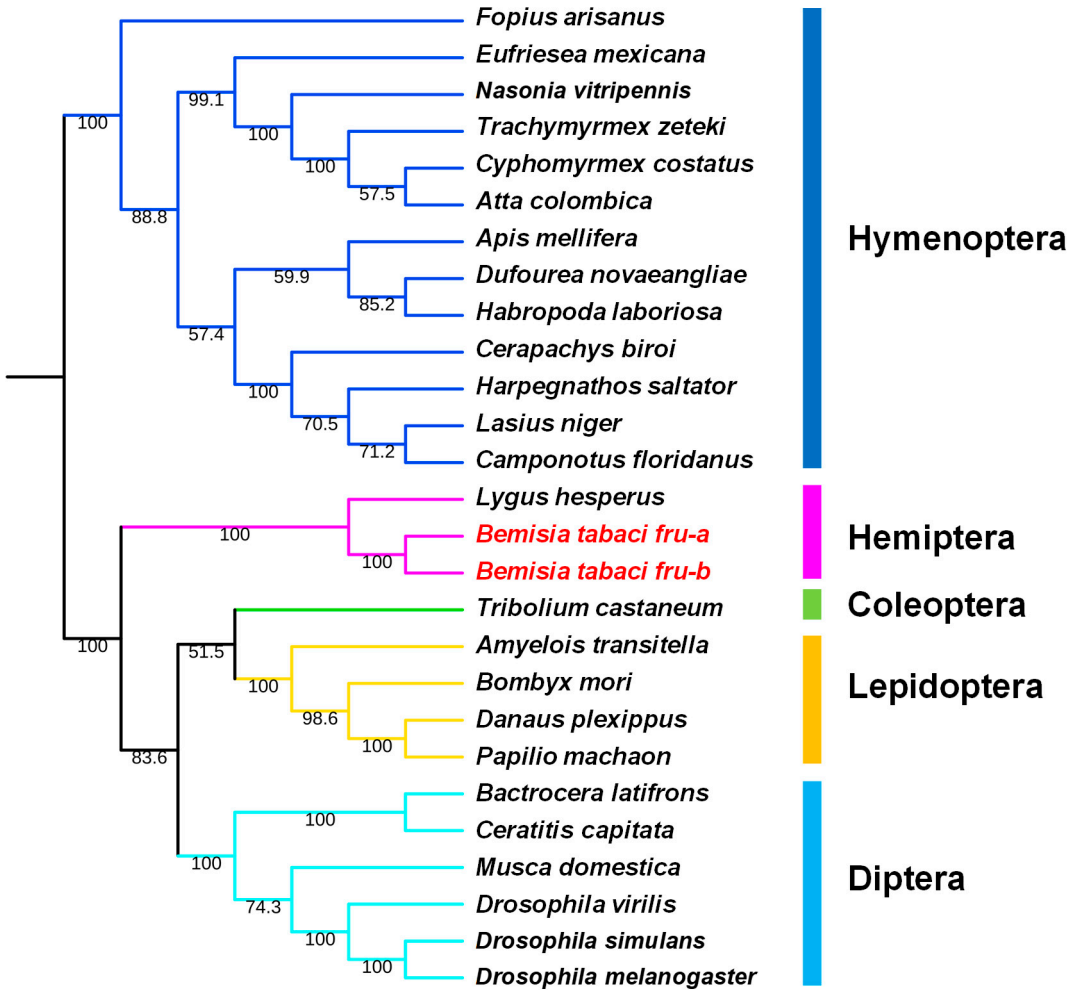

**Figure S2. Conservation of zinc finger domains among insect species.** Alignments are presented separately for ZnA and ZnG domain. Region identities calculated by DNAMAN software are indicated.

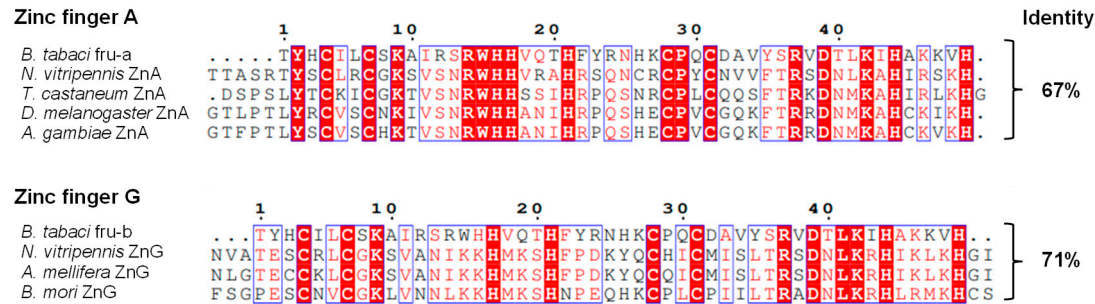

Figure S3. PCR cloning of *fru-a* and *fru-b* in *B. tabaci* female and male.

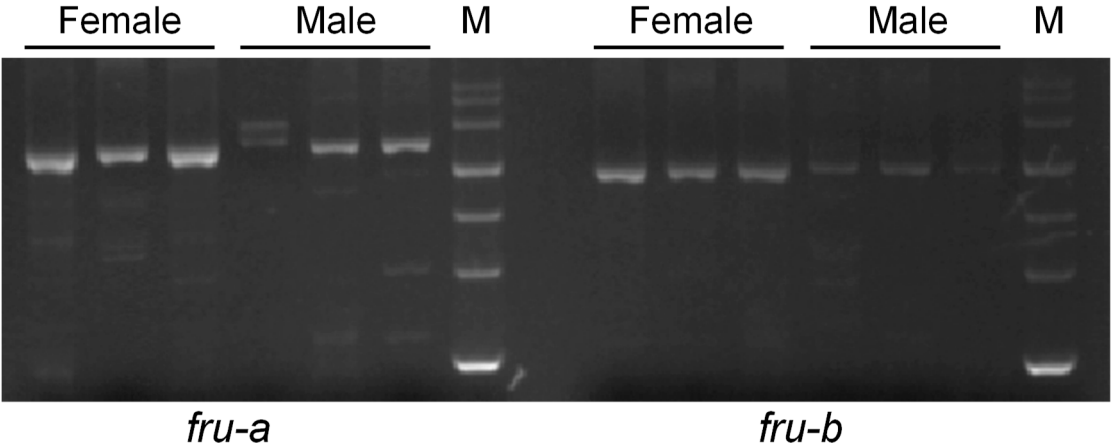

Figure S4. Expression levels of *fru* transcripts in *B. tabaci* adults.

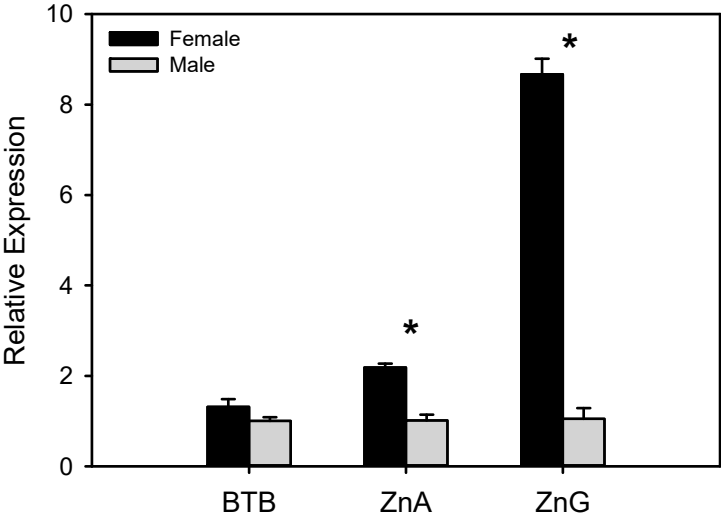

Figure S5. Conservation of BTB domains among insect species. Region identities calculated by DNAMAN software are indicated.

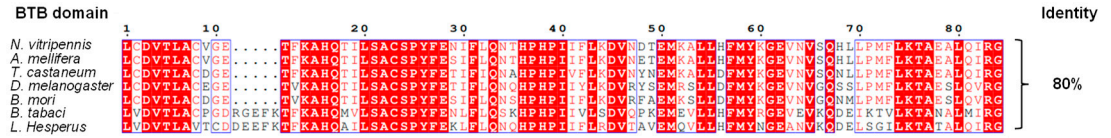

Supplement: s1 [file s1]
